# Supplementary material
Source: bioRxiv or medRxiv preprint supplement (https://www.biorxiv.org/highwire/filestream/36855/field_highwire_adjunct_files/0/125799-1.pdf)
Supplement: Supplementary file [file 125799-1.pdf]

**Table S1: Genes overlapping in at least two domesticated species**

| GENE NAME | OVERLAPPING SPECIES | ENSEMBL ID      | GENE FUNCTION (UniProt)                                                                                                                                                                                                                                                                                                                                                                                                                                                                                                                                                                                                                                                                                                                                                                                                                                                                    | PATHWAY ANNOTATION                                                                                                                                                                                                                                                                                                                                                                                                                                                                                                                                                                                                                                                                                                                                                                                                                                                                                                                                                                                                                                                                                                                                                                                                             | RELATED DISORDERS                                                                                                                                                                                                                                                                                                        |
|-----------|---------------------|-----------------|--------------------------------------------------------------------------------------------------------------------------------------------------------------------------------------------------------------------------------------------------------------------------------------------------------------------------------------------------------------------------------------------------------------------------------------------------------------------------------------------------------------------------------------------------------------------------------------------------------------------------------------------------------------------------------------------------------------------------------------------------------------------------------------------------------------------------------------------------------------------------------------------|--------------------------------------------------------------------------------------------------------------------------------------------------------------------------------------------------------------------------------------------------------------------------------------------------------------------------------------------------------------------------------------------------------------------------------------------------------------------------------------------------------------------------------------------------------------------------------------------------------------------------------------------------------------------------------------------------------------------------------------------------------------------------------------------------------------------------------------------------------------------------------------------------------------------------------------------------------------------------------------------------------------------------------------------------------------------------------------------------------------------------------------------------------------------------------------------------------------------------------|--------------------------------------------------------------------------------------------------------------------------------------------------------------------------------------------------------------------------------------------------------------------------------------------------------------------------|
| ADAMTS13  | cattle, cat         | ENSG00000160323 | Cleaves the vWF multimers in plasma into smaller forms thereby controlling vWF-mediated platelet thrombus formation.                                                                                                                                                                                                                                                                                                                                                                                                                                                                                                                                                                                                                                                                                                                                                                       | Metabolism of proteins (Reactome)                                                                                                                                                                                                                                                                                                                                                                                                                                                                                                                                                                                                                                                                                                                                                                                                                                                                                                                                                                                                                                                                                                                                                                                              | Thrombotic thrombocytopenic purpura, familial (OMIM)                                                                                                                                                                                                                                                                     |
| ATXN7L1   | cat, dog            | ENSG00000146776 | N/A                                                                                                                                                                                                                                                                                                                                                                                                                                                                                                                                                                                                                                                                                                                                                                                                                                                                                        | N/A                                                                                                                                                                                                                                                                                                                                                                                                                                                                                                                                                                                                                                                                                                                                                                                                                                                                                                                                                                                                                                                                                                                                                                                                                            | N/A                                                                                                                                                                                                                                                                                                                      |
| BRAF      | cat, horse          | ENSG00000157764 | Protein kinase involved in the transduction of mitogenic signals from the cell membrane to the nucleus. May play a role in the postsynaptic responses of hippocampal neuron. Phosphorylates MAP2K1, and thereby contributes to the MAP kinase signal transduction pathway.                                                                                                                                                                                                                                                                                                                                                                                                                                                                                                                                                                                                                 | EGFR tyrosine kinase inhibitor resistance, Endocrine resistance, MAPK signaling pathway, ErbB signaling pathway, Rap1 signaling pathway, cAMP signaling pathway, Chemokine signaling pathway, FoxO signaling pathway, mTOR signaling pathway, Vascular smooth muscle contraction, Dorso-ventral axis formation, Focal adhesion, Natural killer cell mediated cytotoxicity, Long-term potentiation, Neurotrophin signaling pathway, Serotonergic synapse, Long-term depression, Regulation of actin cytoskeleton, Insulin signaling pathway, Progesterone-mediated oocyte maturation, Alcoholism, Hepatitis C, Pathways in cancer, Proteoglycans in cancer, Colorectal cancer, Renal cell carcinoma, Pancreatic cancer, Endometrial cancer, Glioma, Prostate cancer, Thyroid cancer, Melanoma, Bladder cancer, Chronic myeloid leukemia, Acute myeloid leukemia, Non-small cell lung cancer, Breast cancer (KEGG); VEGF signaling pathway, T cell activation, Interleukin signaling pathway, Inflammation mediated by chemokine and cytokine signaling pathway, Integrin signaling pathway, EGF receptor signaling pathway, Ras Pathway, Angiogenesis, CKKR signaling map, PDGF signaling pathway, B cell activation (PANTHER). | Thyroid cancer, Malignant melanoma, Noonan syndrome and related disorders, Langerhans cell histiocytosis (KEGG); Adenocarcinoma of lung, somatic; Cardiofaciocutaneous syndrome; Colorectal cancer, somatic; LEOPARD syndrome; Melanoma, malignant, somatic; Non-small cell lung cancer, somatic; Noonan syndrome (OMIM) |
| CLEC5A    | dog, cat            | ENSG00000258227 | Functions as a positive regulator of osteoclastogenesis. Cell surface receptor that signals via TYROBP. Regulates inflammatory responses. Acts as a key regulator of synovial injury and bone erosion during autoimmune joint inflammation (By similarity). Critical macrophage receptor for dengue virus serotypes 1-4.                                                                                                                                                                                                                                                                                                                                                                                                                                                                                                                                                                   | Immune System (Reactome)                                                                                                                                                                                                                                                                                                                                                                                                                                                                                                                                                                                                                                                                                                                                                                                                                                                                                                                                                                                                                                                                                                                                                                                                       | N/A                                                                                                                                                                                                                                                                                                                      |
| DCC       | horse, cat          | ENSG00000187323 | Receptor for netrin required for axon guidance. Mediates axon attraction of neuronal growth cones in the developing nervous system upon ligand binding. Its association with UNC5 proteins may trigger signaling for axon repulsion. It also acts as a dependence receptor required for apoptosis induction when not associated with netrin ligand. Implicated as a tumor suppressor gene.                                                                                                                                                                                                                                                                                                                                                                                                                                                                                                 | Axon guidance mediated by netrin, Axon guidance mediated by Slii/Robo (PANTHER)                                                                                                                                                                                                                                                                                                                                                                                                                                                                                                                                                                                                                                                                                                                                                                                                                                                                                                                                                                                                                                                                                                                                                | Colorectal cancer, somatic; Esophageal carcinoma, somatic; Mirror movements (OMIM)                                                                                                                                                                                                                                       |
| FAM172A   | dog, cattle         | ENSG00000113391 | N/A                                                                                                                                                                                                                                                                                                                                                                                                                                                                                                                                                                                                                                                                                                                                                                                                                                                                                        | N/A                                                                                                                                                                                                                                                                                                                                                                                                                                                                                                                                                                                                                                                                                                                                                                                                                                                                                                                                                                                                                                                                                                                                                                                                                            | N/A                                                                                                                                                                                                                                                                                                                      |
| GRIK3     | dog, cattle         | ENSG00000163873 | Receptor for glutamate that functions as ligand-gated ion channel in the central nervous system and plays an important role in excitatory synaptic transmission. L-glutamate acts as an excitatory neurotransmitter at many synapses in the central nervous system. The postsynaptic actions of Glu are mediated by a variety of receptors that are named according to their selective agonists.                                                                                                                                                                                                                                                                                                                                                                                                                                                                                           | Neuroactive ligand-receptor interaction; Glutamatergic synapse (KEGG); Huntington disease, Ionotropic glutamate receptor pathway, Metabotropic glutamate receptor group III pathway (PANTHER)                                                                                                                                                                                                                                                                                                                                                                                                                                                                                                                                                                                                                                                                                                                                                                                                                                                                                                                                                                                                                                  | schizophrenia, obsessive-compulsive disorder, alcohol dependence (MalaCards)                                                                                                                                                                                                                                             |
| NRG2      | dog, cat, cattle    | ENSG00000158458 | Direct ligand for ERBB3 and ERBB4 tyrosine kinase receptors. Concomitantly recruits ERBB1 and ERBB2 co-receptors, resulting in ligand-stimulated tyrosine phosphorylation and activation of the ERBB receptors. May also promote the heterodimerization with the EGF receptor.                                                                                                                                                                                                                                                                                                                                                                                                                                                                                                                                                                                                             | EGF receptor signaling pathway (PANTHER), EGFR tyrosine kinase inhibitor resistance, ErbB signaling pathway (KEGG).                                                                                                                                                                                                                                                                                                                                                                                                                                                                                                                                                                                                                                                                                                                                                                                                                                                                                                                                                                                                                                                                                                            | Hereditary motor and sensory neuropathy (Charcot-Marie-Tooth disease) (MalaCards)                                                                                                                                                                                                                                        |
| PLAC8L1   | cattle, cat         | ENSG00000173261 | N/A                                                                                                                                                                                                                                                                                                                                                                                                                                                                                                                                                                                                                                                                                                                                                                                                                                                                                        | N/A                                                                                                                                                                                                                                                                                                                                                                                                                                                                                                                                                                                                                                                                                                                                                                                                                                                                                                                                                                                                                                                                                                                                                                                                                            | N/A                                                                                                                                                                                                                                                                                                                      |
| RNPC3     | dog, cat            | ENSG00000185946 | Participates in pre-mRNA U12-dependent splicing, performed by the minor spliceosome which removes U12-type introns. U12-type introns comprises less than 1% of all non-coding sequences. Binds to the 3'-stem-loop of m7G-capped U12 snRNA.                                                                                                                                                                                                                                                                                                                                                                                                                                                                                                                                                                                                                                                | Gene Expression (Reactome)                                                                                                                                                                                                                                                                                                                                                                                                                                                                                                                                                                                                                                                                                                                                                                                                                                                                                                                                                                                                                                                                                                                                                                                                     | growth hormone deficiency, parainfluenza virus type 3, idiopathic inflammatory myopathy, rheumatic disease (MalaCards)                                                                                                                                                                                                   |
| SEC24A    | cat, horse          | ENSG00000113615 | Component of the COPII coat, that covers ER-derived vesicles involved in transport from the endoplasmic reticulum to the Golgi apparatus. COPII acts in the cytoplasm to promote the transport of secretory, plasma membrane, and vacuolar proteins from the endoplasmic reticulum to the Golgi complex.                                                                                                                                                                                                                                                                                                                                                                                                                                                                                                                                                                                   | Protein processing in endoplasmic reticulum (KEGG)                                                                                                                                                                                                                                                                                                                                                                                                                                                                                                                                                                                                                                                                                                                                                                                                                                                                                                                                                                                                                                                                                                                                                                             | N/A                                                                                                                                                                                                                                                                                                                      |
| SMG6      | cat, horse          | ENSG00000070366 | Component of the telomerase ribonucleoprotein (RNP) complex that is essential for the replication of chromosome termini. May have a general role in telomere regulation. Promotes in vitro the ability of TERT to elongate telomeres. Overexpression induces telomere uncapping, chromosomal end-to-end fusions (telomeric DNA persists at the fusion points) and did not perturb TRF2 telomeric localization. Binds to the single-stranded 5'-(GTGTGG)4GTGT-3' telomeric DNA, but not to a telomerase RNA template component (TER). Plays a role in nonsense-mediated mRNA decay. Is thought to provide a link to the mRNA degradation machinery as it has endonuclease activity required to initiate NMD, and to serve as an adapter for UPF1 to protein phosphatase 2A (PP2A), thereby triggering UPF1 dephosphorylation. Degrades single-stranded RNA (ssRNA), but not dsDNA or dsRNA. | mRNA surveillance pathway (KEGG)                                                                                                                                                                                                                                                                                                                                                                                                                                                                                                                                                                                                                                                                                                                                                                                                                                                                                                                                                                                                                                                                                                                                                                                               | tricuspid valve insufficiency (MalaCards)                                                                                                                                                                                                                                                                                |
| STK10     | dog, cattle         | ENSG00000072786 | Serine/threonine-protein kinase involved in regulation of lymphocyte migration. Phosphorylates MSN, and possibly PLK1. Involved in regulation of lymphocyte migration by mediating phosphorylation of ERM proteins such as MSN. Acts as a negative regulator of MAP3K1/MEK1. May also act as a cell cycle regulator by acting as a polo kinase kinase; mediates phosphorylation of PLK1 in vitro; however such data require additional evidences in vivo. (UniProt)                                                                                                                                                                                                                                                                                                                                                                                                                        | N/A                                                                                                                                                                                                                                                                                                                                                                                                                                                                                                                                                                                                                                                                                                                                                                                                                                                                                                                                                                                                                                                                                                                                                                                                                            | Testicular germ cell tumor, seminal vesicle tumor, ocal disease, anus disease, biliary dyskinesia (MalaCards)                                                                                                                                                                                                            |
| TMEM132D  | dog, cattle         | ENSG00000151952 | May serve as a cell-surface marker for oligodendrocyte differentiation.                                                                                                                                                                                                                                                                                                                                                                                                                                                                                                                                                                                                                                                                                                                                                                                                                    | N/A                                                                                                                                                                                                                                                                                                                                                                                                                                                                                                                                                                                                                                                                                                                                                                                                                                                                                                                                                                                                                                                                                                                                                                                                                            | pithrus pubis infestation, lice infestation, parasitic ectoparasitic infectious disease (MalaCards)                                                                                                                                                                                                                      |
| VEZT      | dog, cat            | ENSG00000028203 | Plays a pivotal role in the establishment of adherens junctions and their maintenance in adult life. In case of <i>Listeria</i> infection, promotes bacterial internalization by participating in myosin VIIa recruitment to the entry site.                                                                                                                                                                                                                                                                                                                                                                                                                                                                                                                                                                                                                                               | N/A                                                                                                                                                                                                                                                                                                                                                                                                                                                                                                                                                                                                                                                                                                                                                                                                                                                                                                                                                                                                                                                                                                                                                                                                                            | N/A                                                                                                                                                                                                                                                                                                                      |

**Table S2: Overlapping genes in AMH and domesticated animals**

| GENE NAME | OVERLAPPING SPECIES | ENSEMBL ID       | GENE FUNCTION (UniProt)                                                                                                                                                                                                                                                                                                                                                                                                                                                                                                                                                                                                                                                                                                                                                                                                                                                                                                                                                                                                                                                                                                                                                                                                                                                                                                                                                                                                                                                                                                                                                                                                                                                                                                                                                                                                                                                                                                                                                                                                                                                                                                                                                                                                                                                                                                                                                         | PATHWAY ANNOTATION                                                                                                                                                                                                                                                                                                                                                                                                                                                                                                                                                                                                                                                                                                                                                                                                                                                                                                                                                                                                                                                                                                                                                                                                           | RELATED DISORDERS                                                                                                                                                                                                                                                                                                 |
|-----------|---------------------|------------------|---------------------------------------------------------------------------------------------------------------------------------------------------------------------------------------------------------------------------------------------------------------------------------------------------------------------------------------------------------------------------------------------------------------------------------------------------------------------------------------------------------------------------------------------------------------------------------------------------------------------------------------------------------------------------------------------------------------------------------------------------------------------------------------------------------------------------------------------------------------------------------------------------------------------------------------------------------------------------------------------------------------------------------------------------------------------------------------------------------------------------------------------------------------------------------------------------------------------------------------------------------------------------------------------------------------------------------------------------------------------------------------------------------------------------------------------------------------------------------------------------------------------------------------------------------------------------------------------------------------------------------------------------------------------------------------------------------------------------------------------------------------------------------------------------------------------------------------------------------------------------------------------------------------------------------------------------------------------------------------------------------------------------------------------------------------------------------------------------------------------------------------------------------------------------------------------------------------------------------------------------------------------------------------------------------------------------------------------------------------------------------|------------------------------------------------------------------------------------------------------------------------------------------------------------------------------------------------------------------------------------------------------------------------------------------------------------------------------------------------------------------------------------------------------------------------------------------------------------------------------------------------------------------------------------------------------------------------------------------------------------------------------------------------------------------------------------------------------------------------------------------------------------------------------------------------------------------------------------------------------------------------------------------------------------------------------------------------------------------------------------------------------------------------------------------------------------------------------------------------------------------------------------------------------------------------------------------------------------------------------|-------------------------------------------------------------------------------------------------------------------------------------------------------------------------------------------------------------------------------------------------------------------------------------------------------------------|
| AMBRA1    | horse               | ENSG00000110497  | Regulates autophagy and development of the nervous system. Involved in autophagy in controlling protein turnover during neuronal development, and in regulating normal cell survival and proliferation (By similarity).                                                                                                                                                                                                                                                                                                                                                                                                                                                                                                                                                                                                                                                                                                                                                                                                                                                                                                                                                                                                                                                                                                                                                                                                                                                                                                                                                                                                                                                                                                                                                                                                                                                                                                                                                                                                                                                                                                                                                                                                                                                                                                                                                         | Cellular responses to stress (Reactome)                                                                                                                                                                                                                                                                                                                                                                                                                                                                                                                                                                                                                                                                                                                                                                                                                                                                                                                                                                                                                                                                                                                                                                                      | N/A                                                                                                                                                                                                                                                                                                               |
| BRAF      | cat, horse          | ENSG00000157764  | Protein kinase involved in the transduction of mitogenic signals from the cell membrane to the nucleus. May play a role in the postsynaptic responses of hippocampal neuron. Phosphorylates MAP2K1, and thereby contributes to the MAP kinase signal transduction pathway.                                                                                                                                                                                                                                                                                                                                                                                                                                                                                                                                                                                                                                                                                                                                                                                                                                                                                                                                                                                                                                                                                                                                                                                                                                                                                                                                                                                                                                                                                                                                                                                                                                                                                                                                                                                                                                                                                                                                                                                                                                                                                                      | EGFR tyrosine kinase inhibitor resistance, Endocrine resistance, MAPK signaling pathway, ERB signaling pathway, Rap1 signaling pathway, cAMP signaling pathway, Chemokine signaling pathway, FoxO signaling pathway, mTOR signaling pathway, Vascular smooth muscle contraction, Dorso-ventral axis formation, Focal adhesion, Natural killer cell mediated cytotoxicity, Long-term potentiation, Neurotrophin signaling pathway, Serotonergic synapse, Long-term depression, Regulation of actin cytoskeleton, Insulin signaling pathway, Progesterone-mediated oocyte maturation, Alcoholism, Hepatitis C, Pathways in cancer, Proteoglycans in cancer, Colorectal cancer, Renal cell carcinoma, Pancreatic cancer, Endometrial cancer, Glioma, Prostate cancer, Thyroid cancer, Melanoma, Bladder cancer, Chronic myeloid leukemia, Acute myeloid leukemia, Non-small cell lung cancer, Breast cancer (KEGG); VEGF signaling pathway, T cell activation, Interleukin signaling pathway, Inflammation mediated by chemokine and cytokine signaling pathway, Integrin signaling pathway, EGF receptor signaling pathway, Ras Pathway, Angiogenesis, CCKR signaling map, PDGF signaling pathway, B cell activation (PANTHER) | Thyroid cancer; Malignant melanoma; Noonan syndrome and related disorders; Langerhans cell histiocytosis (KEGG); Adenocarcinoma of lung, somatic; Cardiovascular disease; Colorectal cancer, somatic; LEOPARD syndrome; Melanoma, malignant, somatic; Non-small cell lung cancer, somatic; Noonan syndrome (OMIM) |
| CACNA1D   | horse               | ENSG00000157388  | Voltage-sensitive calcium channels (VSCC) mediate the entry of calcium ions into excitable cells and are also involved in a variety of calcium-dependent processes, including muscle contraction, hormone or neurotransmitter release, gene expression, cell motility, cell division and cell death. The isoform alpha-1D gives rise to L-type calcium currents. Long-lasting (L-type) calcium channels belong to the "high-voltage activated" (HVA) group. They are blocked by dihydropyridines (DHP), phenylalkylamines, benzothiazepines, and by omega-agatoxin-IIIa (omega-Aga-IIIa). They are however insensitive to omega-conotoxin-GVIA (omega-Ctx-GVIA) and omega-agatoxin-IVA (omega-Aga-IVA).                                                                                                                                                                                                                                                                                                                                                                                                                                                                                                                                                                                                                                                                                                                                                                                                                                                                                                                                                                                                                                                                                                                                                                                                                                                                                                                                                                                                                                                                                                                                                                                                                                                                         | Amphetamine addiction, Vascular smooth muscle contraction, MAPK signaling pathway, Calcium signaling pathway, cGMP-PKG signaling pathway, cAMP signaling pathway, Cardiac muscle contraction, Adrenergic signaling in cardiomyocytes, Tight junction, Circadian entrainment, Retrograde endocannabinoid signaling, Glutamatergic synapse, Cholinergic synapse, Serotonergic synapse, GABAergic synapse, Dopaminergic synapse, Insulin secretion, GnRH signaling pathway, Oxytocin signaling pathway, Renin secretion, Aldosterone synthesis and secretion, Type II diabetes mellitus, Carbohydrate digestion and absorption, Alzheimer's disease, Hypertrophic cardiomyopathy, Arrhythmogenic right ventricular cardiomyopathy, Dilated cardiomyopathy (KEGG); Oxytocin receptor mediated signaling pathway, Nicotinic acetylcholine receptor signaling pathway, Beta2 adrenergic receptor signaling pathway, SH2 type receptor mediated signaling pathway, Gonadotropin-releasing hormone receptor pathway, Alzheimer disease-amyloid secretase pathway, Beta1 adrenergic receptor signaling pathway (PANTHER)                                                                                                              | Primary aldosteronism, seizures, and neurologic abnormalities; Sinusoidal node dysfunction and deafness (OMIM)                                                                                                                                                                                                    |
| COA5      | dog                 | ENSG00000183513  | Involved in an early step of the mitochondrial complex IV assembly process.                                                                                                                                                                                                                                                                                                                                                                                                                                                                                                                                                                                                                                                                                                                                                                                                                                                                                                                                                                                                                                                                                                                                                                                                                                                                                                                                                                                                                                                                                                                                                                                                                                                                                                                                                                                                                                                                                                                                                                                                                                                                                                                                                                                                                                                                                                     | N/A                                                                                                                                                                                                                                                                                                                                                                                                                                                                                                                                                                                                                                                                                                                                                                                                                                                                                                                                                                                                                                                                                                                                                                                                                          | Cardioencephalomyopathy, fatal infantile, due to cytochrome c oxidase deficiency 3 (OMIM), Cytochrome c oxidase (COX) deficiency (KEGG)                                                                                                                                                                           |
| COL11A1   | dog                 | ENSG000000060718 | May play an important role in fibrillogenesis by controlling lateral growth of collagen II fibrils.                                                                                                                                                                                                                                                                                                                                                                                                                                                                                                                                                                                                                                                                                                                                                                                                                                                                                                                                                                                                                                                                                                                                                                                                                                                                                                                                                                                                                                                                                                                                                                                                                                                                                                                                                                                                                                                                                                                                                                                                                                                                                                                                                                                                                                                                             | Integrin signaling pathway (PANTHER); Extracellular matrix organization (Reactome)                                                                                                                                                                                                                                                                                                                                                                                                                                                                                                                                                                                                                                                                                                                                                                                                                                                                                                                                                                                                                                                                                                                                           | Fibrochondrogenesis 1; Marshall syndrome; Stickler syndrome, type II; Lumbar disc herniation, susceptibility to (OMIM)                                                                                                                                                                                            |
| COQ10B    | dog                 | ENSG00000115520  | Required for the function of coenzyme Q in the respiratory chain. May serve as a chaperone or may be involved in the transport of Q6 from its site of synthesis to the catalytic sites of the respiratory complexes (By similarity).                                                                                                                                                                                                                                                                                                                                                                                                                                                                                                                                                                                                                                                                                                                                                                                                                                                                                                                                                                                                                                                                                                                                                                                                                                                                                                                                                                                                                                                                                                                                                                                                                                                                                                                                                                                                                                                                                                                                                                                                                                                                                                                                            | Metabolism (Reactome)                                                                                                                                                                                                                                                                                                                                                                                                                                                                                                                                                                                                                                                                                                                                                                                                                                                                                                                                                                                                                                                                                                                                                                                                        | N/A                                                                                                                                                                                                                                                                                                               |
| DLGAP1    | horse               | ENSG00000170579  | Part of the postsynaptic scaffold in neuronal cells.                                                                                                                                                                                                                                                                                                                                                                                                                                                                                                                                                                                                                                                                                                                                                                                                                                                                                                                                                                                                                                                                                                                                                                                                                                                                                                                                                                                                                                                                                                                                                                                                                                                                                                                                                                                                                                                                                                                                                                                                                                                                                                                                                                                                                                                                                                                            | Glutamatergic synapse (KEGG)                                                                                                                                                                                                                                                                                                                                                                                                                                                                                                                                                                                                                                                                                                                                                                                                                                                                                                                                                                                                                                                                                                                                                                                                 | N/A                                                                                                                                                                                                                                                                                                               |
| ERBB4     | cattle              | ENSG00000178568  | Tyrosine-protein kinase that plays an essential role as cell surface receptor for neuregulins and EGF family members and regulates development of the heart, the central nervous system and the mammary gland, gene transcription, cell proliferation, differentiation, migration and apoptosis. Required for normal cardiac muscle differentiation during embryonic development, and for postnatal cardiomyocyte proliferation. Required for normal development of the embryonic central nervous system, especially for normal neural crest cell migration and normal axon guidance. Required for mammary gland differentiation, induction of milk proteins and lactation. Acts as cell-surface receptor for the neuregulins NRG1, NRG2, NRG3 and NRG4 and the EGF family members ETO, ERBB and HBEGF. Ligand binding triggers receptor dimerization and autophosphorylation at specific tyrosine residues that then serve as binding sites for scaffold proteins and effectors. Ligand specificity and signaling is modulated by alternative splicing, proteolytic processing and by the formation of heterodimers with other ERBB family members, thereby creating multiple combinations of intracellular phosphotyrosines that trigger ligand- and context-specific cellular responses. Mediates phosphorylation of SHC1 and activation of the MAP kinases MAPK1/ERK2 and MAPK3/ERK1. Isoform JM-A CYT-1 and isoform JM-B CYT-1 phosphorylate PIK3R1, leading to the activation of phosphatidylinositol 3-kinase and AKT1 and protect cells against apoptosis. Isoform JM-A CYT-1 and isoform JM-B CYT-1 mediate reorganization of the actin cytoskeleton and promote cell migration in response to NRG1. Isoform JM-A CYT-2 and isoform JM-B CYT-2 lack the phosphotyrosine that mediates interaction with PIK3R1, and hence do not phosphorylate PIK3R1, do not protect cells against apoptosis, and do not promote reorganization of the actin cytoskeleton and cell migration. Proteolytic processing of isoform JM-A CYT-1 and isoform JM-A CYT-2 gives rise to the corresponding soluble intracellular domains (iCD) that translocate to the nucleus, promote nuclear import of STAT5A, activation of STAT5A, mammary epithelium differentiation, cell proliferation and activation of gene expression. The ERBB4 soluble intracellular domains (iCD) colocalize with | Erbb signaling pathway, Calcium signaling pathway, Endocytosis, Proteoglycans in cancer (KEGG); Alzheimer disease-prenilin pathway, EGF receptor signaling pathway, Cadherin signaling pathway (PANTHER)                                                                                                                                                                                                                                                                                                                                                                                                                                                                                                                                                                                                                                                                                                                                                                                                                                                                                                                                                                                                                     | Amyotrophic lateral sclerosis 19 (OMIM)                                                                                                                                                                                                                                                                           |
| FAM172A   | cattle, dog         | ENSG00000113391  | N/A                                                                                                                                                                                                                                                                                                                                                                                                                                                                                                                                                                                                                                                                                                                                                                                                                                                                                                                                                                                                                                                                                                                                                                                                                                                                                                                                                                                                                                                                                                                                                                                                                                                                                                                                                                                                                                                                                                                                                                                                                                                                                                                                                                                                                                                                                                                                                                             | N/A                                                                                                                                                                                                                                                                                                                                                                                                                                                                                                                                                                                                                                                                                                                                                                                                                                                                                                                                                                                                                                                                                                                                                                                                                          | N/A                                                                                                                                                                                                                                                                                                               |
| GGT7      | dog                 | ENSG00000131067  | Cleaves glutathione conjugates.                                                                                                                                                                                                                                                                                                                                                                                                                                                                                                                                                                                                                                                                                                                                                                                                                                                                                                                                                                                                                                                                                                                                                                                                                                                                                                                                                                                                                                                                                                                                                                                                                                                                                                                                                                                                                                                                                                                                                                                                                                                                                                                                                                                                                                                                                                                                                 | N/A                                                                                                                                                                                                                                                                                                                                                                                                                                                                                                                                                                                                                                                                                                                                                                                                                                                                                                                                                                                                                                                                                                                                                                                                                          | N/A                                                                                                                                                                                                                                                                                                               |
| GRIA1     | cat                 | ENSG00000155511  | Ionotropic glutamate receptor. L-glutamate acts as an excitatory neurotransmitter at many synapses in the central nervous system. Binding of the excitatory neurotransmitter L-glutamate induces a conformation change, leading to the opening of the cation channel, and thereby converts the chemical signal to an electrical impulse. The receptor then desensitizes rapidly and enters a transient inactive state, characterized by the presence of bound agonist. In the presence of CACNG4 or CACNG7 or CACNG8, shows resensitization which is characterized by a delayed accumulation of current flux upon continued stimulation of the channel.                                                                                                                                                                                                                                                                                                                                                                                                                                                                                                                                                                                                                                                                                                                                                                                                                                                                                                                                                                                                                                                                                                                                                                                                                                                                                                                                                                                                                                                                                                                                                                                                                                                                                                                         | Amphetamine addiction, Circadian entrainment, Long-term depression, Nicotine addiction, cAMP signaling pathway, Neuroactive ligand-receptor interaction, Long-term potentiation, Retrograde endocannabinoid signaling, Glutamatergic synapse, Dopaminergic synapse, Amyotrophic lateral sclerosis (ALS) (KEGG)                                                                                                                                                                                                                                                                                                                                                                                                                                                                                                                                                                                                                                                                                                                                                                                                                                                                                                               | status epilepticus; fragile x syndrome; limbic encephalitis; schizoprenia; amyotrophic lateral sclerosis 1 (MalaCards)                                                                                                                                                                                            |
| GRIK3     | dog, cattle         | ENSG00000163873  | Receptor for glutamate that functions as ligand-gated ion channel in the central nervous system and plays an important role in excitatory synaptic transmission. L-glutamate acts as an excitatory neurotransmitter at many synapses in the central nervous system. The postsynaptic actions of Glu are mediated by a variety of receptors that are named according to their selective agonists. This receptor binds domoate > kainate >> L-glutamate = quisqualate >> AMPA = NMDA.                                                                                                                                                                                                                                                                                                                                                                                                                                                                                                                                                                                                                                                                                                                                                                                                                                                                                                                                                                                                                                                                                                                                                                                                                                                                                                                                                                                                                                                                                                                                                                                                                                                                                                                                                                                                                                                                                             | Glutamatergic synapse, Neuroactive ligand-receptor interaction (KEGG); Huntington disease (PANTHER)                                                                                                                                                                                                                                                                                                                                                                                                                                                                                                                                                                                                                                                                                                                                                                                                                                                                                                                                                                                                                                                                                                                          | schizophrenia; alcohol dependence (MalaCards)                                                                                                                                                                                                                                                                     |
| HSD3B7    | cat                 | ENSG00000099377  | The 3-beta-HSD enzymatic system plays a crucial role in the biosynthesis of all classes of hormonal steroids. HSD VII is active against four 7-alpha-hydroxylated steroids. Does not metabolize several different C(19/21) steroids as substrates. Involved in bile acid synthesis (PubMed:11067870). Plays a key role in cell positioning and movement in lymphoid tissues by mediating degradation of 7-alpha,25-dihydroxycholesterol (7-alpha,25-OHC); 7-alpha,25-OHC acts as a ligand for the G protein-coupled receptor GPR183/EBI2, a chemotactic receptor for a number of lymphoid cells.                                                                                                                                                                                                                                                                                                                                                                                                                                                                                                                                                                                                                                                                                                                                                                                                                                                                                                                                                                                                                                                                                                                                                                                                                                                                                                                                                                                                                                                                                                                                                                                                                                                                                                                                                                                | Primary bile acid biosynthesis, Metabolic pathways (KEGG); Androgen/estrogen/progesterone biosynthesis (PANTHER)                                                                                                                                                                                                                                                                                                                                                                                                                                                                                                                                                                                                                                                                                                                                                                                                                                                                                                                                                                                                                                                                                                             | Bile acid synthesis defect, congenital, 1 (OMIM)                                                                                                                                                                                                                                                                  |
| HSPD1     | dog                 | ENSG00000144381  | Implicated in mitochondrial protein import and macromolecular assembly. May facilitate the correct folding of imported proteins. May also prevent misfolding and promote the refolding and proper assembly of unfolded polypeptides generated under stress conditions in the mitochondrial matrix.                                                                                                                                                                                                                                                                                                                                                                                                                                                                                                                                                                                                                                                                                                                                                                                                                                                                                                                                                                                                                                                                                                                                                                                                                                                                                                                                                                                                                                                                                                                                                                                                                                                                                                                                                                                                                                                                                                                                                                                                                                                                              | Gene Expression, Metabolism of proteins (Reactome)                                                                                                                                                                                                                                                                                                                                                                                                                                                                                                                                                                                                                                                                                                                                                                                                                                                                                                                                                                                                                                                                                                                                                                           | Leukodystrophy, hypomyelinating, 4; Spastic paraplegia 13, autosomal dominant (OMIM)                                                                                                                                                                                                                              |
| HSPE1     | dog                 | ENSG00000115541  | Eukaryotic CPN10 homolog which is essential for mitochondrial protein biogenesis, together with CPN60. Binds to CPN60 in the presence of Mg-ATP and suppresses the ATPase activity of the latter.                                                                                                                                                                                                                                                                                                                                                                                                                                                                                                                                                                                                                                                                                                                                                                                                                                                                                                                                                                                                                                                                                                                                                                                                                                                                                                                                                                                                                                                                                                                                                                                                                                                                                                                                                                                                                                                                                                                                                                                                                                                                                                                                                                               | N/A                                                                                                                                                                                                                                                                                                                                                                                                                                                                                                                                                                                                                                                                                                                                                                                                                                                                                                                                                                                                                                                                                                                                                                                                                          | exocervical carcinoma, senneelsu fever; Leprosy; carion's disease (MalaCards)                                                                                                                                                                                                                                     |
| ITGA9     | cat                 | ENSG00000144688  | Integrin alpha-9beta-1 (ITGA9-ITGB1) is a receptor for VCAM1, cytostatin and osteopontin. It recognizes the sequence A-E-I-D-G-I-E-L in cytostatin.                                                                                                                                                                                                                                                                                                                                                                                                                                                                                                                                                                                                                                                                                                                                                                                                                                                                                                                                                                                                                                                                                                                                                                                                                                                                                                                                                                                                                                                                                                                                                                                                                                                                                                                                                                                                                                                                                                                                                                                                                                                                                                                                                                                                                             | Cell adhesion molecules, PI3K-Akt signaling, Focal adhesion, ECM-receptor interaction, Regulation of actin cytoskeleton, Hypertrophic cardiomyopathy, Arrhythmogenic right ventricular cardiomyopathy, Dilated cardiomyopathy (KEGG); Integrin signaling pathway, Inflammation mediated by chemokine and cytokine signaling pathway (PANTHER)                                                                                                                                                                                                                                                                                                                                                                                                                                                                                                                                                                                                                                                                                                                                                                                                                                                                                | congenital muscular dystrophy with hyperlaxity, multi-torse syndrome; lynch syndrome (MalaCards)                                                                                                                                                                                                                  |
| LRP1B     | cattle              | ENSG00000168702  | cellular cell surface proteins that bind and internalize ligands in the process of receptor-mediated endocytosis.                                                                                                                                                                                                                                                                                                                                                                                                                                                                                                                                                                                                                                                                                                                                                                                                                                                                                                                                                                                                                                                                                                                                                                                                                                                                                                                                                                                                                                                                                                                                                                                                                                                                                                                                                                                                                                                                                                                                                                                                                                                                                                                                                                                                                                                               | Alzheimer disease-prenilin pathway (PANTHER)                                                                                                                                                                                                                                                                                                                                                                                                                                                                                                                                                                                                                                                                                                                                                                                                                                                                                                                                                                                                                                                                                                                                                                                 | endocervical carcinoma (MalaCards)                                                                                                                                                                                                                                                                                |
| LYST      | dog                 | ENSG00000143669  | May be required for sorting endosomal resident proteins into late multivesicular endosomes by a mechanism involving microtubules.                                                                                                                                                                                                                                                                                                                                                                                                                                                                                                                                                                                                                                                                                                                                                                                                                                                                                                                                                                                                                                                                                                                                                                                                                                                                                                                                                                                                                                                                                                                                                                                                                                                                                                                                                                                                                                                                                                                                                                                                                                                                                                                                                                                                                                               | Tropae, piperidine and pyridine alkaloid biosynthesis (KEGG)                                                                                                                                                                                                                                                                                                                                                                                                                                                                                                                                                                                                                                                                                                                                                                                                                                                                                                                                                                                                                                                                                                                                                                 | Chediak-Higashi syndrome (OMIM)                                                                                                                                                                                                                                                                                   |
| MOB4      | dog                 | ENSG00000115540  | May play a role in membrane trafficking, specifically in membrane budding reactions.                                                                                                                                                                                                                                                                                                                                                                                                                                                                                                                                                                                                                                                                                                                                                                                                                                                                                                                                                                                                                                                                                                                                                                                                                                                                                                                                                                                                                                                                                                                                                                                                                                                                                                                                                                                                                                                                                                                                                                                                                                                                                                                                                                                                                                                                                            | N/A                                                                                                                                                                                                                                                                                                                                                                                                                                                                                                                                                                                                                                                                                                                                                                                                                                                                                                                                                                                                                                                                                                                                                                                                                          | N/A                                                                                                                                                                                                                                                                                                               |
| MYLK3     | cat                 | ENSG00000140795  | Kinase that phosphorylates MYL2 in vitro. Promotes sarcomere formation in cardiomyocytes and increases cardiomyocyte contractility (By similarity).                                                                                                                                                                                                                                                                                                                                                                                                                                                                                                                                                                                                                                                                                                                                                                                                                                                                                                                                                                                                                                                                                                                                                                                                                                                                                                                                                                                                                                                                                                                                                                                                                                                                                                                                                                                                                                                                                                                                                                                                                                                                                                                                                                                                                             | Inflammation mediated by chemokine and cytokine signaling pathway, Cytoskeletal regulation by Rho GTPase (PANTHER)                                                                                                                                                                                                                                                                                                                                                                                                                                                                                                                                                                                                                                                                                                                                                                                                                                                                                                                                                                                                                                                                                                           | N/A                                                                                                                                                                                                                                                                                                               |

|          |             |                  |                                                                                                                                                                                                                                                                                                                                                                                                                                                                                                                                                                                                                                                                                                                                                                                                                                                                                                                                                                                                                                                                                                    |                                                                                                                      |                                                                                                                            |
|----------|-------------|------------------|----------------------------------------------------------------------------------------------------------------------------------------------------------------------------------------------------------------------------------------------------------------------------------------------------------------------------------------------------------------------------------------------------------------------------------------------------------------------------------------------------------------------------------------------------------------------------------------------------------------------------------------------------------------------------------------------------------------------------------------------------------------------------------------------------------------------------------------------------------------------------------------------------------------------------------------------------------------------------------------------------------------------------------------------------------------------------------------------------|----------------------------------------------------------------------------------------------------------------------|----------------------------------------------------------------------------------------------------------------------------|
| NCOA6    | dog         | ENSG00000198646  | Nuclear receptor coactivator that directly binds nuclear receptors and stimulates the transcriptional activities in a hormone-dependent fashion. Coactivates expression in an agonist- and AF2-dependent manner. Involved in the coactivation of different nuclear receptors, such as for steroids (GR and ERs), retinoids (RARs and RXRs), thyroid hormone (TRs), vitamin D3 (VDR) and prostanooids (PPARs). Probably functions as a general coactivator, rather than just a nuclear receptor coactivator. May also be involved in the coactivation of the NF-kappa-B pathway. May coactivate expression via a remodeling of chromatin and its interaction with histone acetyltransferase proteins. Protein kinase that seems to act exclusively upon Ithreonine residues (By similarity). Required for normal entry into proliferative arrest after a limited number of cell divisions, also called replicative senescence. Required for normal cell cycle arrest in response to double-stranded DNA damage.                                                                                     | Circadian Clock, Developmental Biology, Gene Expression, Metabolism, Organelle biogenesis and maintenance (Reactome) | hypertensive retinopathy; malignant melanoma, somatic; breast cancer (MalaCards)                                           |
| NEK4     | cat         | ENSG00000114904  |                                                                                                                                                                                                                                                                                                                                                                                                                                                                                                                                                                                                                                                                                                                                                                                                                                                                                                                                                                                                                                                                                                    | N/A                                                                                                                  | N/A                                                                                                                        |
| NTSDC2   | horse       | ENSG00000168268  |                                                                                                                                                                                                                                                                                                                                                                                                                                                                                                                                                                                                                                                                                                                                                                                                                                                                                                                                                                                                                                                                                                    | N/A                                                                                                                  | N/A                                                                                                                        |
| NTM      | horse       | ENSG00000182667  | Neural cell adhesion molecule.                                                                                                                                                                                                                                                                                                                                                                                                                                                                                                                                                                                                                                                                                                                                                                                                                                                                                                                                                                                                                                                                     | cellular process, developmental process (PANTHER)                                                                    | childhood pilocytic astrocytoma; juvenile pilocytic astrocytoma (MalaCards)                                                |
| PLACL8L1 | cat, cattle | ENSG00000173261  |                                                                                                                                                                                                                                                                                                                                                                                                                                                                                                                                                                                                                                                                                                                                                                                                                                                                                                                                                                                                                                                                                                    | N/A                                                                                                                  | N/A                                                                                                                        |
| PPAP2A   | cat         | ENSG000000067113 | Broad-specificity phosphohydrolase that dephosphorylates exogenous bioactive glycerolipids and sphingolipids. Catalyzes the conversion of phosphatidic acid (PA) to diacylglycerol (DG). Pivotal regulator of lysophosphatidic acid (LPA) signaling in the cardiovascular system. Major enzyme responsible of dephosphorylating LPA in platelets, which terminates signaling actions of LPA. May control circulating, and possibly also regulate localized, LPA levels resulting from platelet activation. It has little activity towards ceramide-1-phosphate (C-1-P) and sphingosine-1-phosphate (S-1-P). The relative catalytic efficiency is LPA > PA > S-1-P > C-1-P. It's down-regulation may contribute to the development of colon adenocarcinoma.                                                                                                                                                                                                                                                                                                                                         | Metabolism (Reactome)                                                                                                | N/A                                                                                                                        |
| PPAPDC1B | cat         | ENSG00000147535  | Displays magnesium-independent phosphatidate phosphatase activity in vitro. Catalyzes the conversion of phosphatidic acid to diacylglycerol. May be a metastatic suppressor for hepatocellular carcinoma.                                                                                                                                                                                                                                                                                                                                                                                                                                                                                                                                                                                                                                                                                                                                                                                                                                                                                          | Immune System (Reactome)                                                                                             | hepatocellular carcinoma (MalaCards)                                                                                       |
| PRR11    | cat         | ENSG000000068489 | Plays a critical role in cell cycle progression. Plays a role in cell-cell adhesion through heterophilic trans-interactions with necitin-like proteins or neclins, such as trans-interaction with NECTIN2 at Sertoli-spermatid junctions. Trans-interaction with PVR induces activation of CDC42 and RAC small G proteins through common signaling molecules such as SRC and RAP1. Also involved in the formation of cell-cell junctions, including adherens junctions and synapses. Induces endocytosis-mediated down-regulation of PVR from the cell surface, resulting in reduction of cell movement and proliferation. Plays a role in the morphology of the ciliary body.                                                                                                                                                                                                                                                                                                                                                                                                                     | N/A                                                                                                                  | N/A                                                                                                                        |
| PVRL3    | cattle      | ENSG00000177707  |                                                                                                                                                                                                                                                                                                                                                                                                                                                                                                                                                                                                                                                                                                                                                                                                                                                                                                                                                                                                                                                                                                    | Cell adhesion molecules, Adherens junction (KEGG)                                                                    | N/A                                                                                                                        |
| RFTN2    | dog         | ENSG00000162944  |                                                                                                                                                                                                                                                                                                                                                                                                                                                                                                                                                                                                                                                                                                                                                                                                                                                                                                                                                                                                                                                                                                    | N/A                                                                                                                  | N/A                                                                                                                        |
| RNPC3    | cat, dog    | ENSG00000185946  | Participates in pre-mRNA U12-dependent splicing, performed by the minor spliceosome which removes U12-type introns. U12-type introns comprises less than 1% of all non-coding sequences. Binds to the 3'-stem-loop of m7G-capped U12 snRNA.                                                                                                                                                                                                                                                                                                                                                                                                                                                                                                                                                                                                                                                                                                                                                                                                                                                        | Gene Expression (Reactome)                                                                                           | growth hormone deficiency, parainfluenza virus type 3, idiopathic inflammatory myopathy, rheumatic disease (MalaCards)     |
| SF3B1    | dog         | ENSG00000115524  | Subunit of the splicing factor SF3B required for 'A' complex assembly formed by the stable binding of U2 snRNP to the branchpoint sequence (BPS) in pre-mRNA. Sequence independent binding of SF3A/SF3B complex upstream of the branch site is essential, it may anchor U2 snRNP to the pre-mRNA. May also be involved in the assembly of the 'E' complex. Belongs also to the minor U12-dependent spliceosome, which is involved in the splicing of rare class of nuclear pre-mRNA intron.                                                                                                                                                                                                                                                                                                                                                                                                                                                                                                                                                                                                        | Spliceosome (KEGG)                                                                                                   | Myelodysplastic syndrome, somatic (OMIM)                                                                                   |
| SKA2     | dog         | ENSG00000182628  | Component of the SKA1 complex, a microtubule-binding subcomplex of the outer kinetochore that is essential for proper chromosome segregation. Required for timely anaphase onset during mitosis, when chromosomes undergo bipolar attachment on spindle microtubules leading to silencing of the spindle checkpoint. The SKA1 complex is a direct component of the kinetochore-microtubule interface and directly associates with microtubules as oligomeric assemblies. The complex facilitates the progressive movement of microsphears along a microtubule in a depolymerization-coupled manner. In the complex, it is required for SKA1 localization. Affinity for microtubules is synergistically enhanced in the presence of the ndc-80 complex and may allow the ndc-80 complex to track depolymerizing microtubules.                                                                                                                                                                                                                                                                       | Cell Cycle, Signal Transduction (Reactome)                                                                           | Post-traumatic stress disorder (MalaCards)                                                                                 |
| SNRPD1   | cattle      | ENSG00000167088  | Core component of the spliceosomal U1, U2, U4 and U5 small nuclear ribonucleoproteins (snRNPs), the building blocks of the spliceosome. Thereby, plays an important role in the splicing of cellular pre-mRNAs. Most spliceosomal snRNPs contain a common set of Sm proteins SNRPE, SNRPF, SNRPG, SNRPH, SNRPI, SNRPD2, SNRPD3, SNRPE, SNRPF and SNRPG that assemble in a heptameric protein ring on the Sm site of the small nuclear RNA to form the core snRNP. May act as a charged protein scaffold to promote snRNP assembly or strengthen snRNP-snRNP interactions through nonspecific electrostatic contacts with RNA. Acts as a scavenger receptor for acetylated low density lipoprotein. Binds to both Gram-positive and Gram-negative bacteria and may play a role in defense against bacterial infection. When inhibited in endothelial tube formation assays, there is a marked decrease in cell-cell interactions, suggesting a role in angiogenesis. Involved in the delivery of newly synthesized CHD1/S1-CLP from the biosynthetic compartment to the endosomal/lysosomal system. | Spliceosome, Systemic lupus erythematosus (KEGG)                                                                     | systemic lupus erythematosus; lupus erythematosus (MalaCards)                                                              |
| STAB1    | horse       | ENSG000000010327 | May play a role in vesicle trafficking (By similarity). Binds phosphatidylinositol 3,4,5-trisphosphate. Acts as a RAS27A effector protein and may play a role in cytotoxic granule exocytosis in lymphocytes (By similarity).                                                                                                                                                                                                                                                                                                                                                                                                                                                                                                                                                                                                                                                                                                                                                                                                                                                                      | Vesicle-mediated transport (Reactome)                                                                                | histiocytosis; rosai-dorfman disease (MalaCards)                                                                           |
| SYTL1    | cat         | ENSG00000142765  |                                                                                                                                                                                                                                                                                                                                                                                                                                                                                                                                                                                                                                                                                                                                                                                                                                                                                                                                                                                                                                                                                                    | Vesicle-mediated transport (Reactome)                                                                                | N/A                                                                                                                        |
| TAS2R16  | cattle      | ENSG00000128519  | Gustducin-coupled receptor implicated in the perception of bitter compounds in the oral cavity and the gastrointestinal tract. Signals through PLCB2 and the calcium-regulated cation channel TRPM5.                                                                                                                                                                                                                                                                                                                                                                                                                                                                                                                                                                                                                                                                                                                                                                                                                                                                                               | Taste transduction (KEGG)                                                                                            | Alcohol dependence, susceptibility to (OMIM)                                                                               |
| TEX14    | cat         | ENSG00000121101  | Required both for the formation of intercellular bridges during meiosis and for kinetochore-microtubule attachment during mitosis. Intercellular bridges are evolutionarily conserved structures that connect differentiating germ cells and are required for spermatogenesis and male fertility. Acts by promoting the conversion of midbodies into intercellular bridges via its interaction with CEP55; interaction with CEP55 inhibits the interaction between CEP55 and POC5GIP1/ALX and TSG101, blocking cell abscission and leading to transform midbodies into intercellular bridges. Also plays a role during mitosis; recruited to kinetochores by PLK1 during early mitosis and regulates the maturation of the outer kinetochores and microtubule attachment. Has no protein kinase activity in vitro (By similarity).                                                                                                                                                                                                                                                                 | N/A                                                                                                                  | N/A                                                                                                                        |
| TP53BP1  | cat         | ENSG000000067369 | Plays a key role in the response to DNA damage. May have a role in checkpoint signaling during mitosis. Enhances TP53-mediated transcriptional activation.                                                                                                                                                                                                                                                                                                                                                                                                                                                                                                                                                                                                                                                                                                                                                                                                                                                                                                                                         | NOD-like receptor signaling pathway (KEGG)                                                                           | riddle syndrome; ataxia-telangiectasia; gastric cardia adenocarcinoma; fanconi anemia, complementation group a (MalaCards) |
| ZMYND10  | cat         | ENSG000000004838 | Required for motile ciliary function. Probably involved in axonemal assembly of inner and outer dynein arms (IDA and ODA, respectively) for proper axoneme building for cilia motility. May act by indirectly regulating transcription of dynein proteins.                                                                                                                                                                                                                                                                                                                                                                                                                                                                                                                                                                                                                                                                                                                                                                                                                                         | N/A                                                                                                                  | ciliary dyskinesia, primary, 22 (MalaCards)                                                                                |
| ZNF521   | cattle      | ENSG00000198795  | Transcription factor that can both act as an activator or a repressor depending on the context. Involved in BMP signaling and in the regulation of the immature compartment of the hematopoietic system. Associates with SMADs in response to BMP2 leading to activate transcription of BMP target genes. Acts as a transcriptional repressor via its interaction with EBF1, a transcription factor involved specification of B-cell lineage; this interaction preventing EBF1 to bind DNA and activate target genes.                                                                                                                                                                                                                                                                                                                                                                                                                                                                                                                                                                              | N/A                                                                                                                  | N/A                                                                                                                        |

**Table S3: Overlapping genes between AMH and 2 or more domesticated animals**

| GENE NAME | SPECIES OVERLAP    | ENSEMBL ID      | GENE FUNCTION (UniProt)                                                                                                                                                                                                                                                                                                                                                                                                                                                                    | PATHWAY ANNOTATION                                                                                                                                                                                                                                                                                                                                                                                                                                                                                                                                                                                                                                                                                                                                                                                                                                                                                                                                                                                                                                                                                                                                                                                                              | RELATED DISORDERS                                                                                                                                                                                                                                                                                                        |
|-----------|--------------------|-----------------|--------------------------------------------------------------------------------------------------------------------------------------------------------------------------------------------------------------------------------------------------------------------------------------------------------------------------------------------------------------------------------------------------------------------------------------------------------------------------------------------|---------------------------------------------------------------------------------------------------------------------------------------------------------------------------------------------------------------------------------------------------------------------------------------------------------------------------------------------------------------------------------------------------------------------------------------------------------------------------------------------------------------------------------------------------------------------------------------------------------------------------------------------------------------------------------------------------------------------------------------------------------------------------------------------------------------------------------------------------------------------------------------------------------------------------------------------------------------------------------------------------------------------------------------------------------------------------------------------------------------------------------------------------------------------------------------------------------------------------------|--------------------------------------------------------------------------------------------------------------------------------------------------------------------------------------------------------------------------------------------------------------------------------------------------------------------------|
| BRAF      | cat, horse, human  | ENSG00000157764 | Protein kinase involved in the transduction of mitogenic signals from the cell membrane to the nucleus. May play a role in the postsynaptic responses of hippocampal neuron. Phosphorylates MAP2K1, and thereby contributes to the MAP kinase signal transduction pathway.                                                                                                                                                                                                                 | EGFR tyrosine kinase inhibitor resistance, Endocrine resistance, MAPK signaling pathway, ErbB signaling pathway, Rap1 signaling pathway, cAMP signaling pathway, Chemokine signaling pathway, FcγO signaling pathway, mTOR signaling pathway, Vascular smooth muscle contraction, Dorsal-ventral axis formation, Focal adhesion, Natural killer cell mediated cytotoxicity, Long-term potentiation, Neurotrophin signaling pathway, Serotonergic synapse, Long-term depression, Regulation of actin cytoskeleton, Insulin signaling pathway, Progesterone-mediated oocyte maturation, Alcoholism, Hepatitis C, Pathways in cancer, Proteoglycans in cancer, Colorectal cancer, Renal cell carcinoma, Pancreatic cancer, Endometrial cancer, Glioma, Prostate cancer, Thyroid cancer, Melanoma, Bladder cancer, Chronic myeloid leukemia, Acute myeloid leukemia, Non-small cell lung cancer, Breast cancer (KEGG); VEGF signaling pathway, T cell activation, Interleukin signaling pathway, Inflammation mediated by chemokine and cytokine signaling pathway, Integrin signalling pathway, EGF receptor signaling pathway, Ras Pathway, Angiogenesis, CCKR signaling map, PDGF signaling pathway, B cell activation (PANTHER) | Thyroid cancer; Malignant melanoma; Noonan syndrome and related disorders; Langerhans cell histiocytosis (KEGG); Adenocarcinoma of lung, somatic; Cardiofaciocutaneous syndrome; Colorectal cancer, somatic; LEOPARD syndrome; Melanoma, malignant, somatic; Non-small cell lung cancer, somatic; Noonan syndrome (OMIM) |
| FAM172A   | cattle, dog, human | ENSG00000113391 | N/A<br>Receptor for glutamate that functions as ligand-gated ion channel in the central nervous system and plays an important role in excitatory synaptic transmission. L-glutamate acts as an excitatory neurotransmitter at many synapses in the central nervous system. The postsynaptic actions of Glu are mediated by a variety of receptors that are named according to their selective agonists. This receptor binds domoate > kainate >> L-glutamate = quisqualate >> AMPA = NMDA. | N/A                                                                                                                                                                                                                                                                                                                                                                                                                                                                                                                                                                                                                                                                                                                                                                                                                                                                                                                                                                                                                                                                                                                                                                                                                             | N/A                                                                                                                                                                                                                                                                                                                      |
| GRIK3     | dog, cattle, human | ENSG00000163873 | N/A<br>Receptor for glutamate that functions as ligand-gated ion channel in the central nervous system and plays an important role in excitatory synaptic transmission. L-glutamate acts as an excitatory neurotransmitter at many synapses in the central nervous system. The postsynaptic actions of Glu are mediated by a variety of receptors that are named according to their selective agonists. This receptor binds domoate > kainate >> L-glutamate = quisqualate >> AMPA = NMDA. | Glutamatergic synapse, Neuroactive ligand-receptor interaction (KEGG); Huntington disease (PANTHER)                                                                                                                                                                                                                                                                                                                                                                                                                                                                                                                                                                                                                                                                                                                                                                                                                                                                                                                                                                                                                                                                                                                             | schizophrenia; alcohol dependence (MalaCards)                                                                                                                                                                                                                                                                            |
| PLAC8L1   | cat, cattle, human | ENSG00000173261 | N/A<br>Participates in pre-mRNA U12-dependent splicing, performed by the minor spliceosome which removes U12-type introns. U12-type introns comprises less than 1% of all non-coding sequences. Binds to the 3'-stem-loop of m7G-capped U12 snRNA.                                                                                                                                                                                                                                         | N/A<br>Gene Expression (Reactome)                                                                                                                                                                                                                                                                                                                                                                                                                                                                                                                                                                                                                                                                                                                                                                                                                                                                                                                                                                                                                                                                                                                                                                                               | N/A<br>growth hormone deficiency, parainfluenza virus type 3, idiopathic inflammatory myopathy, rheumatic disease (MalaCards)                                                                                                                                                                                            |
| RNPC3     | cat, dog, human    | ENSG00000185946 | N/A<br>Participates in pre-mRNA U12-dependent splicing, performed by the minor spliceosome which removes U12-type introns. U12-type introns comprises less than 1% of all non-coding sequences. Binds to the 3'-stem-loop of m7G-capped U12 snRNA.                                                                                                                                                                                                                                         | N/A                                                                                                                                                                                                                                                                                                                                                                                                                                                                                                                                                                                                                                                                                                                                                                                                                                                                                                                                                                                                                                                                                                                                                                                                                             | N/A                                                                                                                                                                                                                                                                                                                      |







|           |                                               |                  |          |            |           |
|-----------|-----------------------------------------------|------------------|----------|------------|-----------|
| MFRP      | NCOA6                                         | dog              | TRPC7    | RAET1L     | TMEM151A  |
| MFSD11    | NDUFB1                                        | cattle           | TSC22D1  | RAF1       | TMEM50A   |
| MGAT4A    | NEK1                                          | cat              | TSC22D4  | RASSF6     | TMEM87A   |
| MB1       | NEK4                                          | cat              | TSGA10   | RBMS3      | TMPRSS11A |
| MISA1     | NFAH1                                         | cat              | TTC19    | RC3TB2P1   | TRAP      |
| MKL1      | NFKBIZ                                        | cat              | UBE2D2   | REL        | TRIM42    |
| MKLN1     | NID2                                          | horse            | UGDH     | RG53       | TSC2      |
| MLH1      | NINJ1                                         | horse            | UQCRRHP4 | RHBDD3     | TSNAXIP1  |
| MMP9      | NIP2L                                         | dog              | USP32    | RHOA       | TTC39CP1  |
| MOB4      | NIPBL                                         | horse            | USP4     | RIMS2      | TTC8      |
| MPND      | NKAN2                                         | dog              | USP8P1   | RNF213     | TT2       |
| MRFLA9    | NOCT                                          | dog              | VAV3     | RNF6       | TUSC2     |
| MRPS5     | NOL4                                          | dog              | VN1R66P  | RPL12P41   | U3        |
| MTMR4     | NOLC1                                         | cat              | VN1R67P  | RPL27AP    | UBE2D3P3  |
| MTRNR2L7  | NOSTRIN                                       | cat              | VRBP     | RPL32      | UBL5P4    |
| MUSTN1    | NOTCH2                                        | cat              | VPS41    | RPL32P1    | USP24P1   |
| MYH3      | NPA33                                         | cattle           | WASF5P   | RPL35P6    | USP43     |
| MYH4      | NPFPR2                                        | cat              | XKR3     | RPL36AP40  | USP46     |
| MYL4      | NPTX1                                         | cattle           | XPNPPEP3 | RP56P7     | USP6P1    |
| MYLK3     | NR2F2                                         | cattle           | XPDS     | RSP02      | VCAN      |
| NADK2     | NR3C2                                         | horse            | YWHAZP4  | RTTN       | VDAC1P5   |
| NAT6      | NRF1                                          | dog              | ZCWPW1   | RWDD4P2    | VPS13B    |
| NAT8      | NRG2                                          | dog, cat, cattle | ZNF514   | SBF2       | VPS26BP1  |
| NAV3      | NRG4                                          | cattle           | ZNF568   | SCARA3     | VPS39     |
| NCOA5     | NRXN1                                         | cattle           | ZNF670   | SCN10A     | VPS8      |
| NCOA6     | NT5DC2                                        | horse            | ZNF675   | SCUBE2     | VWF       |
| NDUFA11   | NTAN1                                         | dog              | ZNF695   | SDHAP3     | WASF5P    |
| NEAT1     | NTM                                           | horse            | ZNF720   | SKK1       | WDRCP     |
| NEB       | NUD1T15                                       | cat              | ZNF725P  | SEC11A     | WR95P     |
| NEDD1     | NUMB                                          | horse            | ZNF815P  | SEC63      | WWP2      |
| NEK4      | NUP133                                        | horse            | ZNF92    | SEMA5B     | YIF1A     |
| NETO2     | NUP54                                         | dog              | ZPBP     | SENP7      | ZDHHC20P2 |
| NEXN      | NXPE3                                         | dog              | ZSWIM7   | SERPINA3   | ZDHHC24   |
| NFG3      | OLIG1                                         | cattle           |          | SH2D4A     | ZMYM1     |
| NISCH     | OMA1                                          | dog              |          | SLC17A6    | ZMYND10   |
| NLK       | OPML                                          | horse            |          | SLC25A1P2  | ZNF394    |
| NLRX1     | OPTC                                          | cat              |          | SLC25A26   | ZNF48     |
| NMUR2     | OR10K1                                        | cat              |          | SLC38A8    | ZNF493    |
| NOTO      | OR13C8                                        | cattle           |          | SLC6A16    | ZNF675    |
| NPRL2     | OR2B11                                        | cat              |          | SLC9C2     | ZNF682    |
| NR0B2     | OR4D6                                         | cat              |          | SLFN12     | ZNF747    |
| NR2F1     | OR51A7                                        | cattle           |          | SMARCD2    | ZNF768    |
| NT5DC2    | OR8A4                                         | dog              |          | SMC3       | ZNF771    |
| NTM       | ORF olfactory receptor family cluster (Chromo | cattle           |          | SNRPC      | ZNF789    |
| NTRK2     | ORF olfactory receptor family cluster (Chromo | cattle           |          | SOCS2P2    |           |
| NUDC      | ORF olfactory receptor family cluster (Chromo | cattle           |          | SOQ2       |           |
| NUFIP1    | ORF olfactory receptor family cluster (Chromo | cattle           |          | SORBS1     |           |
| NUP37     | OTOF                                          | cat              |          | SORBS2     |           |
| NWD1      | PAFAH2                                        | cat              |          | SP140      |           |
| NWD2      | PARP12                                        | dog              |          | SPATS2L    |           |
| NXPH1     | PARVG                                         | cat              |          | SPDL1      |           |
| NYAP2     | PCDH16                                        | cattle           |          | SPECC1L    |           |
| ORA5D     | PCDH41                                        | cat              |          | SPINT3     |           |
| OTUD4     | PCDH84                                        | cat              |          | SPOCK3     |           |
| OTX1      | PCSK5                                         | horse            |          | SPTLC3     |           |
| PACSN1    | PDE4D                                         | dog              |          | ST6GAL2    |           |
| PAIP2     | PDE4DIP                                       | horse            |          | ST6GALNAC3 |           |
| PARP3     | PDE5A                                         | horse            |          | STAB2      |           |
| PARPBP    | PDE7B                                         | dog              |          | STAT14     |           |
| PATL2     | PDLT                                          | dog              |          | STK31      |           |
| PBRM1     | PDHR1                                         | horse            |          | STXBPL5L   |           |
| PC        | PDXDC1                                        | dog              |          | TBC1D22A   |           |
| PCBP4     | PEX7                                          | cattle           |          | TBC1D27    |           |
| PCCB      | PHF2                                          | horse            |          | TBRG4      |           |
| PCCDH17   | PHF20                                         | horse            |          | TDP1       |           |
| PCDH9     | PHLDB3                                        | cat              |          | TDKXH      |           |
| PCGF6     | PIK3C3                                        | horse            |          | TF         |           |
| PCNX      | PIR1M1                                        | cat              |          | TF6        |           |
| PDCD4     | PLA2                                          | cat              |          | TMEM117    |           |
| PDE4B     | PKD1L1                                        | dog              |          | TMEM200B   |           |
| PDI3A     | PLA2G2E                                       | cat              |          | TMEM40     |           |
| PDZD2     | PLA2G3                                        | cat              |          | TMEM5      |           |
| PDZD3     | PLAC1                                         | cat              |          | TMPRSS2    |           |
| PEL1      | PLAC8L1                                       | cat, cattle      |          | TMPRSS3    |           |
| PEX13     | PLAG1                                         | cattle           |          | TNFRSF13B  |           |
| PHACTR1   | PLEC1                                         | dog              |          | TNFRSF1B   |           |
| PHF2      | PLEKHH1                                       | cat              |          | TNKS1BP1   |           |
| PHKB      | PLEKHM3                                       | dog              |          | TNP01      |           |
| PIGV      | PLIN3                                         | cat              |          | TP53BP1    |           |
| PIK3CG    | PLXNA4                                        | horse            |          | TPRXL      |           |
| PLA2G16   | PML                                           | cat              |          | TPX2       |           |
| PLA2G4D   | Pol                                           | cattle           |          | TRAT1      |           |
| PLA2G4E   | POLI                                          | dog              |          | TRIM25     |           |
| PLA2GDF   | POLR1E                                        | dog              |          | TRIM34     |           |
| PLAC8L1   | POP1                                          | horse            |          | TRIM6      |           |
| PLXDC2    | PPAP2A                                        | cat              |          | TSG101     |           |
| PMCH      | PPAPDC1B                                      | cat              |          | TTCC23L    |           |
| POC1A     | PPFIBP1                                       | cat              |          | TTN        |           |
| PODXL     | PPM1D                                         | horse            |          | TUBA8      |           |
| POMGN1    | PPP1R13B                                      | cat              |          | TUBB4BP5   |           |
| POTEC     | PPP2CA                                        | horse            |          | U2SURP     |           |
| POU2F2    | PRICKLE4                                      | cat              |          | US         |           |
| POU3F1    | PRKAG1                                        | cat              |          | UBASH3A    |           |
| POU5F2    | PRKCZ                                         | horse            |          | UTP20      |           |
| PPAP2A    | PRKG2                                         | cat              |          | VN1R20P    |           |
| PPAPDC1A  | PRMT3                                         | horse            |          | VN1R31P    |           |
| PPAPDC1B  | PRR11                                         | cat              |          | VN1R32P    |           |
| PPIL4     | PRX                                           | cat              |          | VN1R33P    |           |
| PPIP5K1   | PSMB7                                         | horse            |          | VN2R9P     |           |
| PPM1E     | PSPH                                          | cat              |          | VVASA      |           |
| PPM1M     | PSTK                                          | cat              |          | WDF4       |           |
| PPP2R1B   | PTPN4                                         | horse            |          | WDR47      |           |
| PRADC1    | PTPRR                                         | cat              |          | WDR62      |           |
| PRDM10    | PTPRS                                         | cat              |          | WDR87      |           |
| PRDM2     | PUSL1                                         | cat              |          | XKR3       |           |
| PRKAR2B   | PVRL3                                         | cattle           |          | YTHDF2     |           |
| PRKDC     | Q2ABD2                                        | dog              |          | ZDHHC13    |           |
| PRKDD     | RAB3GAP1                                      | dog              |          | ZDHHC20P2  |           |
| PRKME2    | RABGAP1L                                      | dog              |          | ZNF280D    |           |
| PRR11     | RABL3                                         | cat              |          | ZNF33BP1   |           |
| PSTPIP2   | RALY                                          | dog              |          | ZNF592     |           |
| PTPN23    | RANBP17                                       | dog              |          | ZNF605     |           |
| PTPRD     | RAPH1                                         | dog              |          | ZNF7       |           |
| PUS10     | RBM11                                         | cat              |          | ZNF718     |           |
| PVRL3     | RBP5                                          | cat              |          | ZNF804B    |           |
| QSER1     | RCS01                                         | cat              |          | ZNF850     |           |
| RAB11F1P5 | REEP1                                         | dog              |          | ZNF861P    |           |
| RAB28     | RELL1                                         | cat              |          | ZSWIM5     |           |
| RABAC1    | RELT                                          | dog              |          |            |           |
| RAD51C    | RFTN2                                         | dog              |          |            |           |
| RAD54L    | RG9MTD3                                       | dog              |          |            |           |
| RAD54L2   | RHBDD1                                        | cat              |          |            |           |
| RANBP1    | RHPN1                                         | horse            |          |            |           |
| RANBP3    | RIMKLA                                        | cat              |          |            |           |
| RARRES3   | RNAS5E                                        | cat              |          |            |           |
| RASA1     | RNF103                                        | dog              |          |            |           |
| RASGEF1A  | RNF144B                                       | cattle           |          |            |           |
| RASSF1    | RNPC3                                         | dog, cat         |          |            |           |
| RASSF3    | ROBO1                                         | cattle           |          |            |           |
| RB1CC1    | RPL3                                          | dog              |          |            |           |



|             |             |             |
|-------------|-------------|-------------|
| RBF0X2      | RPL31       | dog         |
| RBL1        | RRN3        | dog         |
| RBM14       | RRN3P1      | dog         |
| RBM15B      | RRNRP2      | dog         |
| RBM4        | RSL1D1      | cat         |
| RBM4B       | RTP3        | cat         |
| RBSG3       | S100A12     | cat         |
| RCE1        | SAE1        | dog         |
| REL         | SCARB2      | dog         |
| RET         | SCN9A       | cat         |
| RFT1        | SCP2D1      | dog         |
| RFTM2       | SCOPE1      | horse       |
| RC36        | SCRIB       | cat         |
| RIF1        | SDAD1       | dog         |
| RNF133      | SDK2        | cat         |
| RNF148      | SEC24A      | cat, horse  |
| RNF220      | SEC63       | horse       |
| RNF26       | SEMA3D      | dog         |
| RNF43       | SEM6A       | cattle      |
| RNF44       | SENP5       | cat         |
| RNPC3       | SENP7       | cat         |
| ROBO2       | SEPT10      | cat         |
| ROCK1       | SERINC3     | cat         |
| RPL13AP6    | SETBP1      | dog         |
| RPL29       | SETD9       | dog         |
| RPS18P9     | SETMAR      | cattle      |
| RPS6K6A1    | SF3B1       | dog         |
| RBP9        | SGCD        | horse       |
| RSP03       | SH2D5       | cat         |
| SAMHD1      | SH3GL2      | dog         |
| SCAP        | SHC4        | cat         |
| SCMH1       | SIAE        | cat         |
| SCYL3       | SKA2        | dog         |
| SEC23IP     | SKP1        | horse       |
| SEC24D      | SLC22A13    | cat         |
| SEMA3F      | SLC22A15    | horse       |
| SEMA3G      | SLC22A18    | cat         |
| SEMA6D      | SLC25A38    | cat         |
| SEPT4       | SLC35D1     | cattle      |
| SERF2       | SLC35F5     | cat         |
| SERINC4HYPK | SLC39A7     | cat         |
| SESN1       | SLC39A8     | cat         |
| SETD1A      | SLC41A2     | cattle      |
| SFA3        | SLC43A1     | horse       |
| SF3B1       | SLC46A1     | cat         |
| SFMBT1      | SLC5A1      | dog         |
| SFXN5       | SLC5A4      | dog         |
| SGMS2       | SLC6A1      | cattle      |
| SGSM3       | SLC6A17     | dog         |
| SH3GL1      | SLC9A6      | dog         |
| SH3RF2      | SLC01A2     | cat         |
| SHOC2       | SMC4        | dog         |
| SHZ         | SMC1        | cat         |
| SIN3B       | SMG6        | cat, horse  |
| SIPA1L1     | SMIM23      | dog         |
| SKA2        | SMO         | dog         |
| SKIV2L2     | SMYD2       | dog         |
| SKP2        | SNAP29      | dog         |
| SLC12A5     | SNRPD1      | cattle      |
| SLC16A1     | SPATA19     | horse       |
| SLC1A1      | SPATA21     | cat         |
| SLC25A17    | SPATA7      | cat         |
| SLC26A3     | SPERT       | cat         |
| SLC26A4     | SPHKAP      | cat         |
| SLC2A5      | SPINT1      | cat         |
| SLC30A2     | SPTAN1      | cattle      |
| SLC35B1     | SPTBNS      | cat         |
| SLC35E1     | SREBF1      | cat         |
| SLC38A9     | SRF72       | dog         |
| SLC4A10     | SRRM2       | cat         |
| SLC4A4      | STAB1       | horse       |
| SLC9A1      | STARDS      | cat         |
| SLFNL1      | STARDS      | dog         |
| SLIT2       | STK10       | dog, cattle |
| SLITR1      | STK11P      | cat         |
| SLITR3      | STS         | cat         |
| SMAD1       | STX7        | dog         |
| SMAD9       | STXBP6      | horse       |
| SMG8        | SUN3        | cat         |
| SMIM4       | SURF2       | cat         |
| SMIM7       | SUSD3       | horse       |
| SMYD5       | SYNM        | cat         |
| SNAI2       | SYTL1       | cat         |
| SNAP23      | TACK1       | cattle      |
| SNF         | TAS2R1      | cat         |
| SNHG4       | TAS2R16     | cattle      |
| SNRPD1      | TAS2R3      | cat         |
| SORCS1      | TAS2R38     | dog         |
| SORCS2      | TBC1D9      | dog         |
| SORCS3      | TBXAS1      | dog         |
| SPATS2L     | TCTN1       | horse       |
| SPCS1       | TCTN3       | dog         |
| SPG11       | TEK3        | dog         |
| SPIDR       | TEX14       | cat         |
| SPOP        | TF          | cat         |
| SPTB2       | TFPC2L1     | cattle      |
| SRSF2       | TH          | dog         |
| ST7         | THBS2       | cat         |
| STAB1       | THEGL       | dog         |
| STAD        | THUMPD1     | cat         |
| STAG1       | THYN1       | horse       |
| STAMPB      | TLX3        | dog         |
| STARSD      | TMEM114     | dog         |
| STK3        | TMEM132D    | dog, cattle |
| STMN2       | TMEM159     | dog         |
| STRC        | TMEM242     | dog         |
| STX1A       | TMEM59L     | cat         |
| STX1B       | TMEM71      | cat         |
| SUP74H1     | TNRSF9      | cattle      |
| SYNP02      | TNKS2       | dog         |
| SYT1        | TOE1        | cat         |
| SYT6        | TP53BP1     | cat         |
| SYTL1       | TRAPPC8     | horse       |
| SYVN1       | TRBV25OR9-2 | dog         |
| TAC4        | TRIM16      | dog         |
| TAF5        | TRIM59      | dog         |
| TANC2       | TRIO        | horse       |
| TAS2R16     | TRMT61A     | dog         |
| TBC1D23     | TRPV6       | cat         |
| TBX1        | TRY1        | dog         |
| TDRD3       | TRY2        | dog         |
| TDRD7       | TRY3        | dog         |
| TEX14       | TSTD2       | dog         |
| TEX264      | TTC38A      | dog         |
| TFA2D       | TUBGCP5     | dog         |
| TGM4        | TVP23B      | dog         |
| TGM5        | TVP23C      | dog         |
| TGM7        | TXN2        | cat         |
| THSD7B      | TXNRD2      | cat         |
| THTPA       | TYK2        | cat         |

|          |         |          |
|----------|---------|----------|
| TK2      | U2      | dog      |
| TKT      | UBE2B   | horse    |
| TLE3     | UBXN10  | cat      |
| TLR9     | ULBP3   | cattle   |
| TMTSF2   | UMOD    | dog      |
| TMEM110  | UNC93A  | cattle   |
| TMEM115  | URB2    | horse    |
| TMEM123  | USP45   | cat      |
| TMEM17   | UVRAG   | cat      |
| TMEM222  | V1R     | dog      |
| TMEM235  | VDAC1   | horse    |
| TMEM262  | VEZT    | dog, cat |
| TMEM38A  | VPS26B  | horse    |
| TMEM42   | VRK1    | horse    |
| TMEM62   | VWC2    | dog      |
| TMEM67A  | VWDE    | cattle   |
| TMOD1    | WASF3   | horse    |
| TNFRSF21 | WDR17   | cat      |
| TNRC1    | WDR62   | cat      |
| TNRC9B   | WDR90   | cat      |
| TNS1     | WFDC9   | cat      |
| TP53BP1  | WIPF2   | cat      |
| TP53INP2 | WIPF3   | cat      |
| TPD52    | WNK2    | horse    |
| TPRKB    | WWC1    | cat      |
| TRANK1   | XCR1    | cat      |
| TRIM37   | XPBP    | dog      |
| TRIM43   | XP-C    | cat      |
| TRIM69   | XPO6    | cattle   |
| TRIM71   | YSK4    | dog      |
| TRMT2A   | YWHAH   | dog      |
| TRNP1    | ZC3H3   | horse    |
| TTBK2    | ZFAT    | cat      |
| TTC6     | ZFYVE19 | cat      |
| TUBGCP4  | ZMYND10 | cat      |
| TUSC2    | ZNF236  | dog      |
| TWF2     | ZNF286A | dog      |
| TYW5     | ZNF286B | dog      |
| U6       | ZNF436  | cat      |
| U7       | ZNF492  | dog      |
| UBE2V2   | ZNF516  | dog      |
| UBR1     | ZNF521  | cattle   |
| UGGT2    | ZNF555  | cat      |
| UGP2     | ZNF622  | cat      |
| UGT8     | ZNF679  | dog      |
| UNC50    | ZNF780B | cat      |
| UOCRH    | ZP2     | dog      |
| UOCRHL   | ZPBP    | dog      |
| USP33    | ZZEF1   | cat      |
| USP34    |         |          |
| USP54    |         |          |
| UTP11    |         |          |
| VAFB     |         |          |
| VMAC     |         |          |
| VOPP1    |         |          |
| VPS39    |         |          |
| VPS51    |         |          |
| VPS54    |         |          |
| WASF2    |         |          |
| WISSCR22 |         |          |
| WDPCP    |         |          |
| WDR59    |         |          |
| WDR76    |         |          |
| WDR82    |         |          |
| WDT01    |         |          |
| WHSC1L1  |         |          |
| WIZ      |         |          |
| XP01     |         |          |
| ZBBX     |         |          |
| ZBTB20   |         |          |
| ZBTB34   |         |          |
| ZDHHC18  |         |          |
| ZDHHC8   |         |          |
| ZEB2     |         |          |
| ZFHx4    |         |          |
| ZFL1     |         |          |
| ZIC4     |         |          |
| ZMYND10  |         |          |
| ZNF106   |         |          |
| ZNF197   |         |          |
| ZNF2     |         |          |
| ZNF205   |         |          |
| ZNF213   |         |          |
| ZNF248   |         |          |
| ZNF25    |         |          |
| ZNF33A   |         |          |
| ZNF33B   |         |          |
| ZNF35    |         |          |
| ZNF37A   |         |          |
| ZNF407   |         |          |
| ZNF501   |         |          |
| ZNF502   |         |          |
| ZNF514   |         |          |
| ZNF521   |         |          |
| ZNF574   |         |          |
| ZNF638   |         |          |
| ZNF852   |         |          |
| ZNHIT2   |         |          |
| ZNRF1    |         |          |
| ZSCAN29  |         |          |

Table S4b: Contrasts between domesticates, between AMH and each domesticate, and between great apes and domesticates (for further statistical analysis, see Table S4c)

|             | dog = 229                | cat = 291              | cattle = 78              | horse = 109            | AMH = 742                |
|-------------|--------------------------|------------------------|--------------------------|------------------------|--------------------------|
| dog = 229   |                          | $v = 5, p = 0.2575646$ | $v = 5, p = 0.002250835$ | $v = 0$                | $v = 15, p = 0.02334542$ |
| cat = 291   | $v = 5, p = 0.2575646$   |                        | $v = 3, p = 0.1111013$   | $v = 4, p = 0.0805177$ | $v = 15, p = 0.1454225$  |
| cattle = 78 | $v = 5, p = 0.002250835$ | $v = 3, p = 0.1111013$ |                          | $v = 0$                | $v = 9, p = 0.002784603$ |
| horse = 109 | $v = 0$                  | $v = 4, p = 0.0805177$ | $v = 0$                  |                        | $v = 7, p = 0.1219762$   |

$p < 0.05$   
 $p < 0.01$

| Intersections between domesticates |                  |                |               | Intersections between total AMH and each domesticate |              |                  |               | Intersections between great apes and domesticates |                 |                  |  |
|------------------------------------|------------------|----------------|---------------|------------------------------------------------------|--------------|------------------|---------------|---------------------------------------------------|-----------------|------------------|--|
| DOG-CAT [5]                        | DOG-CATTLE [5]** | CAT-CATTLE [3] | CAT-HORSE [4] | AMH-DOG [15]*                                        | AMH-CAT [15] | AMH-CATTLE [9]** | AMG-HORSE [7] | DOM-CHIMP [16]                                    | DOM-ORANGO [20] | DOM-GORILLA [12] |  |
| ATXN7L1                            | FAM172A          | ADAMT513       | BRAP          | COA5                                                 | BRAP         | ERBB4            | AMBRA1        | ALK                                               | ACOX3           | CUX2             |  |
| CLECSA                             | GRK3             | NRG2           | DCC           | COL11A1                                              | GRIK1        | FAM172A          | BRAP          | AMBRA1                                            | ADAMDEC1        | DNAH9            |  |
| NRG2                               | NRG2             | PLAC8L1        | SEC24A        | COQ10B                                               | HS03B7       | GRIK3            | CACNA1D       | C3orf62                                           | ADAMTSL3        | FER              |  |
| RNPC3                              | STK10            |                | SMG6          | FAM172A                                              | ITGA9        | LRP1B            | DLGAP1        | EHBP1L1                                           | ALK             | IMMP2L           |  |
| VEZT                               | TMEM132D         |                |               | GGT7                                                 | MYLK3        | PLAC8L1          | NTSDC2        | FAF1                                              | BARO1           | MRPL11           |  |
|                                    |                  |                |               | GRK3                                                 | NEK4         | PVRL3            | NTM           | HADH                                              | DNAJB9          | OPCML            |  |
|                                    |                  |                |               | HSPD1                                                | PLAC8L1      | SNRPD1           | STAB1         | INPP4B                                            | FAM172A         | cattle_dog       |  |
|                                    |                  |                |               | HSPE1                                                | PPAP2A       | TAS2R16          |               | LCAT                                              | ISG15           | PRKAG1           |  |
|                                    |                  |                |               | LYST                                                 | PPAPDC1B     | ZNF521           |               | LHFPL3                                            | KDM3A           | RSL1D1           |  |
|                                    |                  |                |               | MCS4                                                 | PRR11        |                  |               | MGAM                                              | KYNU            | SCNA9A           |  |
|                                    |                  |                |               | NCOA6                                                | RNPC3        |                  |               | NIPBL                                             | NRXN1           | SGCD             |  |
|                                    |                  |                |               | RFTN2                                                | SYTL1        |                  |               | NXPE3                                             | PITRM1          | ZMYND10          |  |
|                                    |                  |                |               | RNPC3                                                | TEX14        |                  |               | RABGAP1L                                          | PLCE1           |                  |  |
|                                    |                  |                |               | SFB1                                                 | TP53BP1      |                  |               | STABP6                                            | POLI            |                  |  |
|                                    |                  |                |               | SKA2                                                 | ZMYND10      |                  |               | TRBV25OR3-2                                       | RABGAP1L        |                  |  |
|                                    |                  |                |               |                                                      |              |                  |               | ZBPB                                              | SEC63           |                  |  |
|                                    |                  |                |               |                                                      |              |                  |               |                                                   | SENP7           |                  |  |
|                                    |                  |                |               |                                                      |              |                  |               |                                                   | TF              |                  |  |
|                                    |                  |                |               |                                                      |              |                  |               |                                                   | TP53BP1         |                  |  |
|                                    |                  |                |               |                                                      |              |                  |               |                                                   | WDR62           |                  |  |
|                                    |                  |                |               |                                                      |              |                  |               |                                                   |                 |                  |  |

\*  $p < 0.05$   
 \*\*  $p < 0.01$

**Table S4c: Results of the hypergeometric intersection tests**

|                                       |                                                                                | <b>Domesticates</b>        |                          |                             |                         | <b>Total domesticates = 691</b> |
|---------------------------------------|--------------------------------------------------------------------------------|----------------------------|--------------------------|-----------------------------|-------------------------|---------------------------------|
|                                       |                                                                                | <b>Dog = 229</b>           | <b>Cat = 291</b>         | <b>Cattle = 78</b>          | <b>Horse = 109</b>      |                                 |
| <b>AMH</b>                            | Peyrégne et al. 2016 = <b>375</b>                                              | -                          | -                        | -                           | -                       | $v = 18; p = 0.1199135$         |
|                                       | Racimo 2016 = <b>326</b>                                                       | -                          | -                        | -                           | -                       | $v = 16; p = 0.1191519$         |
|                                       | Prüfer et al. 2014 = <b>108</b>                                                | -                          | -                        | -                           | -                       | $v = 9; p = 0.01456058 *$       |
|                                       | Prüfer et al. 2014 + Racimo 2016 = <b>419</b>                                  | -                          | -                        | -                           | -                       | $v = 24; p = 0.01478488 *$      |
|                                       | Total AMH (Peyrégne et al. 2016, Racimo 2016, Prüfer et al. 2014) = <b>742</b> | $v = 15; p = 0.02934342 *$ | $v = 15; p = 0.1454225$  | $v = 9; p = 0.002784603 **$ | $v = 7; p = 0.1219762$  | $v = 41; p = 0.003407041 **$    |
| <b>Great apes (Cagan et al. 2016)</b> | Chimpanzee ( <i>Pan t. troglodytes</i> ) = <b>415</b>                          | $v = 6; p = 0.3614671$     | $v = 5; p = 0.7449666$   | $v = 0$                     | $v = 5; p = 0.08336393$ | $v = 16; p = 0.4008807$         |
|                                       | Orango ( <i>Pongo abelii</i> ) = <b>500</b>                                    | $v = 5; p = 0.7023469$     | $v = 12; p = 0.07285972$ | $v = 2; p = 0.598045$       | $v = 2; p = 0.7728682$  | $v = 20; p = 0.3207204$         |
|                                       | Gorilla ( <i>G. g. gorilla</i> ) = <b>426</b>                                  | $v = 2; p = 0.9619034$     | $v = 7; p = 0.4519085$   | $v = 0$                     | $v = 3; p = 0.4267467$  | $v = 12; p = 0.8291688$         |
